# Supplementary material for: Alkaline reagent-induced structural diversity of four metal–organic frameworks based on a flexible bicarboxylate ligand
Source: Royal Society of Chemistry journal article supplement (doi:10.1039/c6ce00170j), 2016-01-01
Supplement: c6ce00170j1.pdf [file c6ce00170j1.pdf]

## Alkaline reagents-induced structural diversity of four metal-organic frameworks based on flexible bicarboxylate ligand

Yue-Ling Bai,<sup>\*a</sup> Liangzhen Xu,<sup>a</sup> Xiaoli Bao,<sup>b</sup> Chaoyi Hou,<sup>a</sup> Yongmei Zhao,<sup>a</sup> Shourong Zhu<sup>\*a</sup>

<sup>a</sup>*Innovative Drug Center, Department of Chemistry, College of Science, Shanghai University, Shanghai 200444, P. R. China.*

<sup>b</sup>*Instrumental Analysis Center, Shanghai Jiao Tong University, Shanghai 200240, P. R. China*

E-mail: yuelingbai@shu.edu.cn.

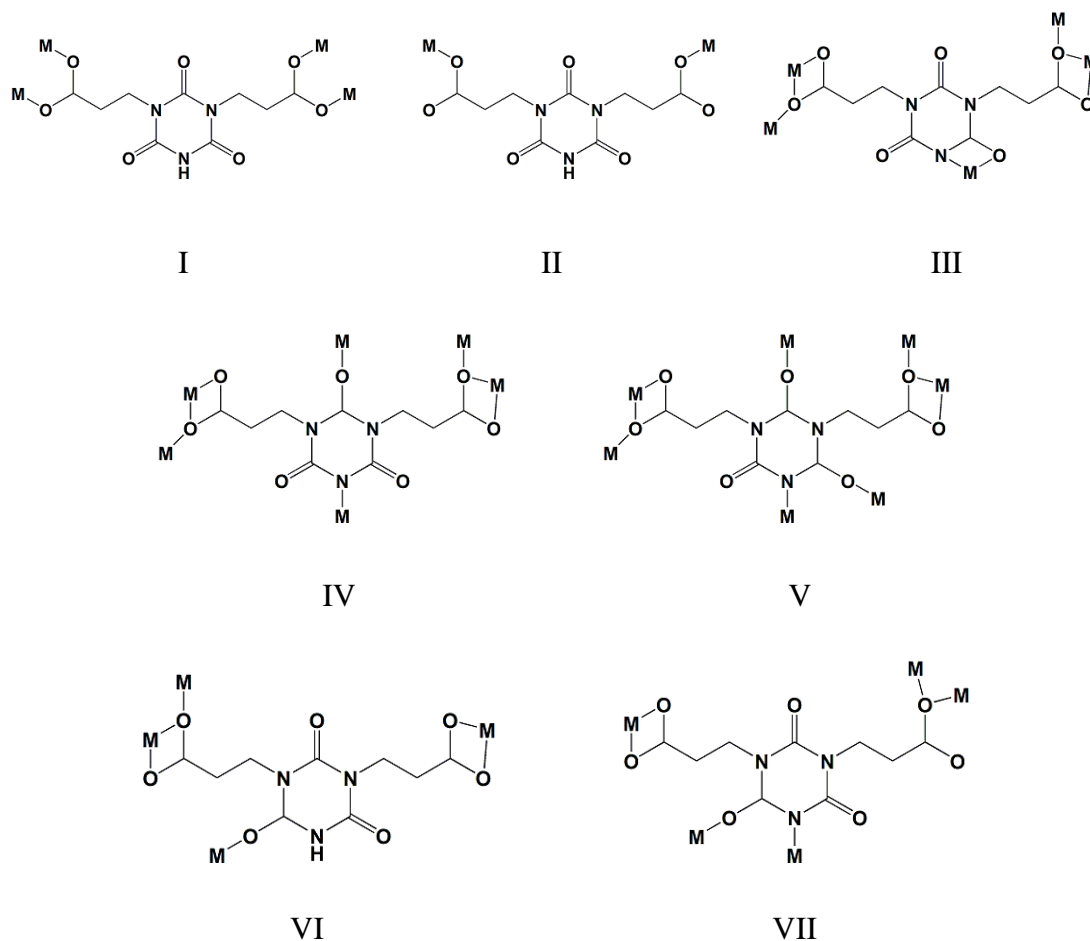

**Scheme S1** The coordination modes reported (I-III) previously and found (IV-VII) in this work of H<sub>3</sub>bci ligand.

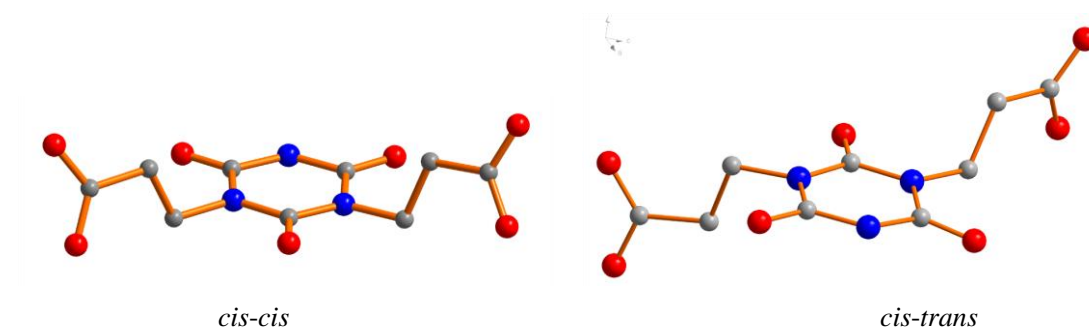

**Scheme S2** The ligand conformation of *cis-cis* and *cis-trans*.

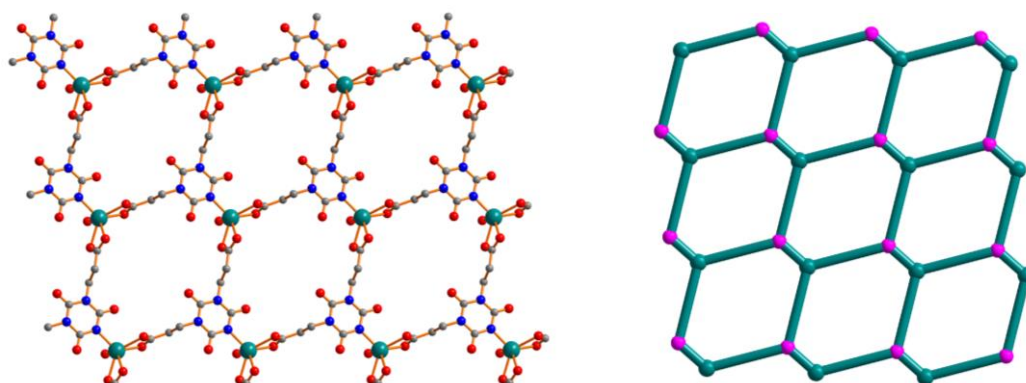

**Fig. S1** The 2D Cd-bci layer structure and its uninodal 3-connected *hcb* topology with the point symbol of  $\{6^3\}$  in **1**.

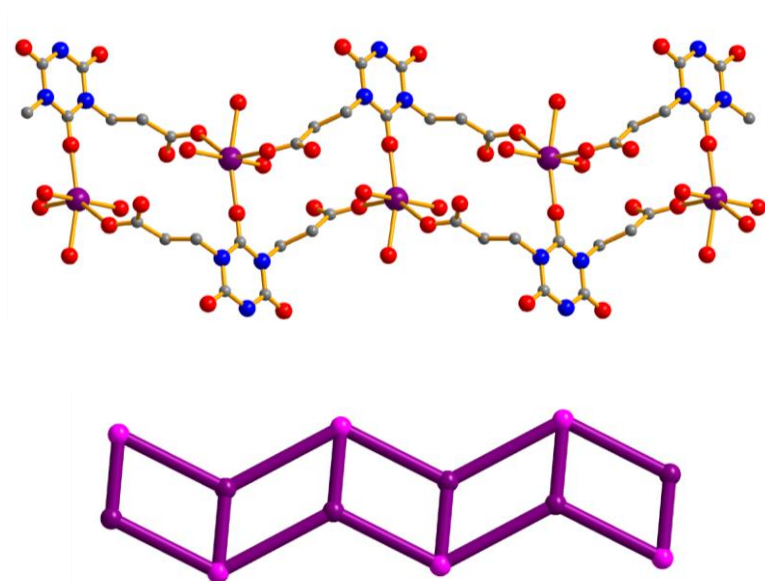

**Fig. S2** The infinite 1D ladder-like Na-bci chain in **1**.

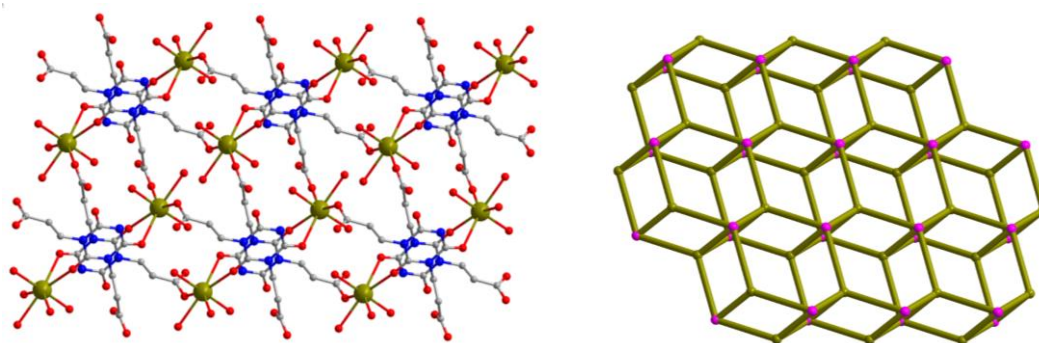

**Fig. S3** The 2D potassium double-layer structure and its uninodal 4-connected *sp* topology with the point symbol of  $\{4^3 \cdot 6^3\}$  in **2**.

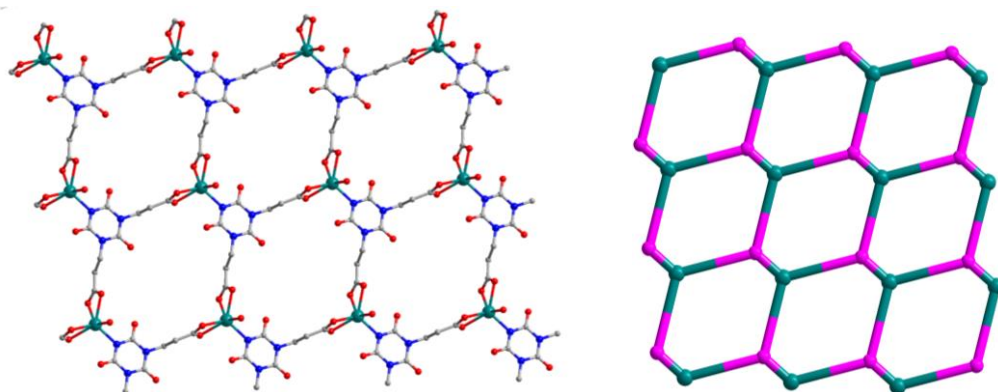

**Fig. S4** The 2D cadmium layer structure and its uninodal 3-connected *hcb* topology with the point symbol of  $\{6^3\}$  in **2**.

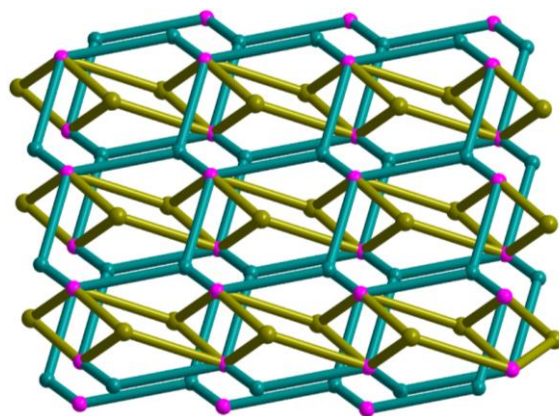

**Fig. S5** The schematic representations of the 3-nodal 3,4,7-connected new topology with the point symbol of  $\{4 \cdot 6^2\} \{4^4 \cdot 6^2\} \{4^5 \cdot 6^{12} \cdot 8^4\}$  along the *b*-axis of complex **2**.

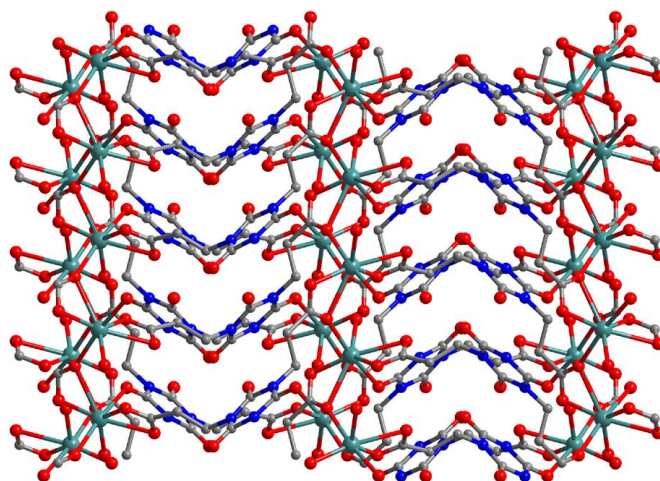

**Fig. S6** The 3D MOF structure of **3** is view along the *a*-axis.

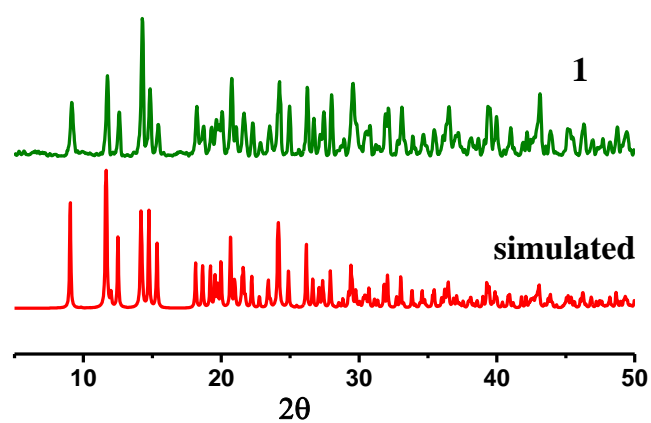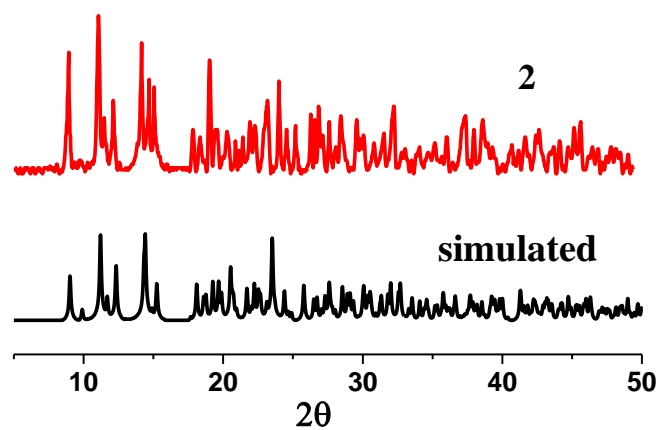

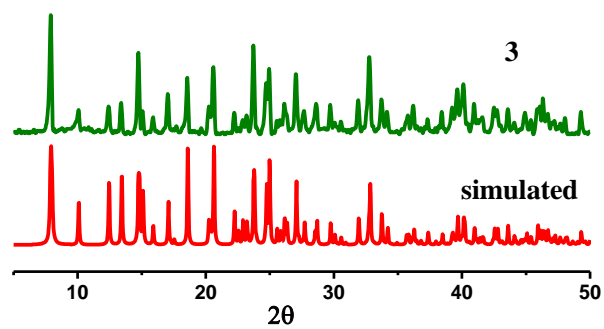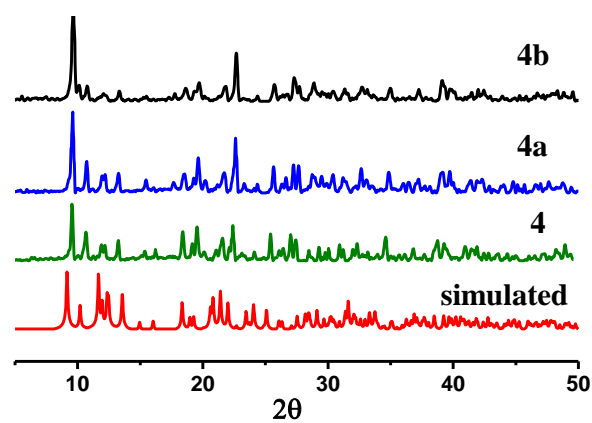

**Fig. S7** The PXRD patterns of **1-4**, **4a** and **4b**, respectively.

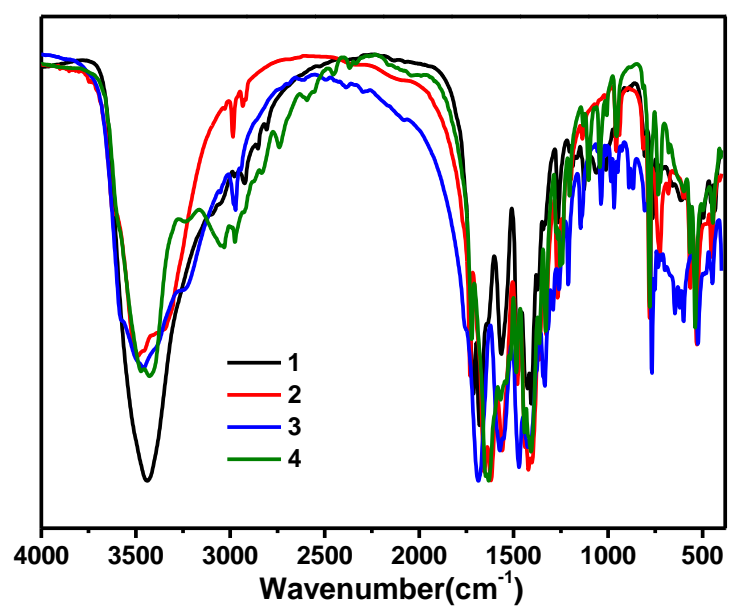

**Fig. S8** Infrared spectra of complexes **1-4**.

**Table S1.** Hydrogen bonds (Å) for **4**.

| <b>D-H...A</b> | <b>D...A</b> |
|----------------|--------------|
| N4-H4C...O2W   | 2.778(3)     |
| N4-H4D...O1W   | 2.814(2)     |
| N4-H4E...O7    | 2.784(3)     |
| O1W-H1A...O6   | 2.866(3)     |
| O2W-H2A...O1   | 3.012(2)     |
| O2W-H2B...O4   | 2.689(2)     |
